# Supplementary material for: Use of ESI-FTICR-MS to Characterize Dissolved Organic Matter in Headwater Streams Draining Forest-Dominated and Pasture-Dominated Watersheds
Source: PubMed Central journal article supplement (PMC4694922; doi:10.1371/journal.pone.0145639), 2015-12-29

**S2 Appendix II:** Van Krevelen diagrams of refractory compounds in bacteria+light incubations unique for P1 and P2.

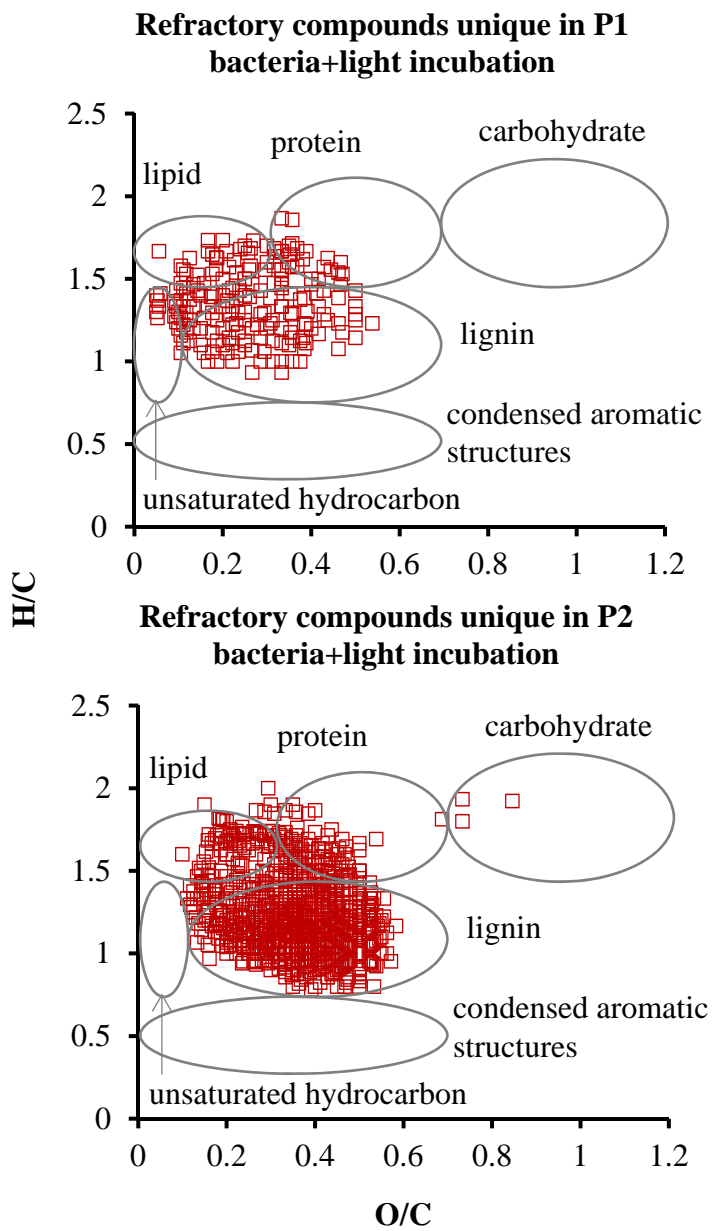

Supplement: pone.0145639.s002.pdf [file pone.0145639.s002.pdf]
